# Supplementary material for: Estimating distributions of health state severity for the global burden of disease study
Source: Popul Health Metr. 2015 Nov 18;13:31. doi: 10.1186/s12963-015-0064-y (PMC4650517; doi:10.1186/s12963-015-0064-y)
Supplement: Additional file 2: — MEPS Model Results. (XLSX 18 kb) [file 12963_2015_64_MOESM2_ESM.xlsx]

## Sheet: Annex Table B1 - MEPS Model Res
Cause	Mean DW	Lower DW	Upper DW	N
Amputation of finger(s) (with or without thumb or toe)	-0.0025185	-0.0362716	0.0467475	73
Burns	0.008112	-0.0024088	0.0180168	891
Severe chest injury	0.0369035	0.0111109	0.0713944	93
Long term outcome of dislocation of hip/knee/shoulder	0.022954	0.0155209	0.0303745	2876
Injury Requiring Emergency Care	0.0495408	0.0067828	0.101574	153
Fracture of radius or ulna	0.0311409	0.0008731	0.0848278	120
Fracture of wrist and other distal part of hand, fracture of foot except ankle	0.0183079	0.0085767	0.0290058	2784
Fracture of femur	0.143364	0.075706	0.230623	92
Fracture of clavicle, scapula, humerus, or skull	0.0350812	0.0123064	0.0638942	651
Fracture of Hip	0.0888465	0.0274043	0.153886	319
Fracture of patella, tibia, fibula, or ankle	0.0385858	0.0235197	0.0551986	941
Fracture of pelvis	0.0980828	0.0487374	0.169681	117
Fracture of sternum, rib, or face bone	0.0238176	0.013034	0.0362658	2161
Fracture of vertebral column	0.0641624	0.0390489	0.0908394	524
Head Injury	0.0150395	0.000295	0.0295123	1073
Injured nerves	0.0849236	0.0439088	0.137163	155
Open wound, superficial injuries and dislocations	0.0085997	0.0061497	0.0107818	19836
Spinal Cord Lesion	0.119925	0.0729691	0.170589	172
Injury Requiring Urgent Care	0.0050239	-0.0014534	0.0121979	5391
Allergic rhinitis	0.0038818	0.001587	0.0063367	26158
Hemolytic anemias	0.0344511	0.0223281	0.0472769	2923
Candidiasis	0.002738	-0.0069741	0.0123186	2363
Cerebral palsy	0.0790273	0.0384271	0.130796	279
Gastroesophageal reflux disease	0.0228939	0.0178534	0.0277014	12508
Hearing loss not due to other diseases or injuries	0.0138302	0.0037658	0.0239554	2434
Hepatitis	0.109711	0.0753789	0.147581	589
Drug use disorders	0.0187155	0.0058754	0.0329054	723
Other neoplasms	0.0024567	-0.0018658	0.0068344	6210
Non-melanoma skin cancer	0.0029567	-0.0042225	0.0103873	2330
Unspecified cancer site	0.056259	0.0385429	0.0761178	1189
Neonatal conditions	0.0558437	0.0198595	0.1165	258
Osteomyelitis	0.0745293	0.0310247	0.133565	94
Unspecified symptoms	0.0264691	0.024509	0.0284879	63347
Pelvic inflamamtory disease	0.020145	0.0020275	0.043992	172
Poliomyelitis	0.196054	0.0163119	0.633932	11
Pulmonary heart disease	0.0914752	0.0426946	0.14965	238
Chronic sinusitis	0.0031303	0.0008272	0.00554	12865
Other vision loss	0.0277208	0.0165527	0.0396785	2786
Cirrhosis of the liver	0.0804574	0.0406087	0.130588	333
Chronic kidney diseases	0.148272	0.118068	0.178541	851
CKD due to hypertension	-0.0581569	-0.798893	0.182116	10
Other chromosomal abnormalities	0.0029986	-0.0065391	0.0153019	189
Cleft lip and cleft palate	0.0198858	-0.0093041	0.0881113	85
Congenital heart anomalies	0.0608144	0.0238521	0.107277	271
Neural tube defects	0.0734352	0.0293277	0.128702	89
Other congenital anomalies	0.0207227	0.009738	0.0337575	1247
Atrial fibrillation and flutter	0.0328353	0.0253137	0.0412027	3822
Cardiomyopathy and myocarditis	0.0904091	0.0374638	0.162512	151
Any heart failure	0.113786	0.0925729	0.137234	1922
Hypertensive heart disease	0.0321249	0.002063	0.0522725	7
Angina pectoris	0.0860156	0.0664876	0.106058	1736
Other circulatory diseases	0.049971	0.0453259	0.0549055	12788
Peripheral vascular disease	0.0330793	0.0004286	0.0682826	286
Rheumatic heart disease	-0.0108245	-0.0991228	0.0904475	27
Cerebrovascular disease	0.106381	0.0910289	0.122043	3260
Diabetes mellitus	0.0694604	0.0660578	0.0730732	20820
Gall bladder and bile duct disease	0.0169619	0.0078141	0.0265816	1626
Gastritis and duodenitis	0.0129232	-0.0026532	0.0297199	1628
Inguinal/femoral hernia	0.0349307	0.0117758	0.0645976	190
Noninfective inflammatory bowel disease	0.0298894	0.0176055	0.0425092	1171
Pancreatitis	0.0469768	0.0110413	0.0856208	341
Peptic ulcer disease	0.0541983	0.0343614	0.0749395	1340
Vascular insufficiency of intestine	-0.0080528	-0.106102	0.0791386	9
Other Endocrine, nutritional, blood and immune disorders	0.0182455	0.014996	0.0214725	17108
Endometriosis	0.0247587	0.0084452	0.0430931	392
Infertility (female)	0.0021434	-0.0017474	0.0061564	190
Fibroids	0.0121182	-0.0033333	0.0305163	272
Other gynecological disorders	0.0084579	0.0055769	0.0116935	8736
Genital prolapse	-0.006647	-0.0389673	0.0196295	205
HIV/AIDS	0.0687095	0.0428248	0.101418	282
Hypertensive disorders of pregnancy	0.0049106	-0.0037739	0.0158707	40
Other maternal conditions	0.0051357	0.0019717	0.0089115	1590
Meningitis and encephalitis	0.0033824	-0.0295619	0.0386883	170
ADHD	-0.0067069	-0.0192606	0.0046701	4865
Alcohol use disorders	0.0519465	0.0133934	0.0994154	301
Anxiety disorders	0.0487828	0.0445784	0.0533482	17054
Bipolar affective disorder	0.0983673	0.0835112	0.114711	2375
Conduct disorder	0.0629703	0.01247	0.131741	449
Intellectual disability	0.0351036	0.0042502	0.0762791	295
Other mental and behavioral disorders	0.044103	0.0341905	0.0544466	3119
Schizophrenia	0.0938479	0.0685418	0.121865	1939
Unipolar depressive disorders	0.0843911	0.0801187	0.0889521	19670
Gout	0.0229554	0.0131627	0.0334547	2420
Osteoarthritis	0.067939	0.0590804	0.0776661	4780
Other musculoskeletal disorders	0.0368695	0.0347627	0.0389206	49296
Back pain	0.0327364	0.029515	0.0359416	17242
Intervertebral disk disorders	0.0899707	0.0801081	0.100177	4333
Neck pain	0.0166811	0.0084191	0.0252309	2656
Rheumatoid arthritis	0.1298	0.113576	0.146575	2750
Bladder cancer	0.0184282	-0.0099787	0.0455167	224
Brain and nervous system cancers	0.0771726	0.0031049	0.174949	38
Breast cancer	0.0310827	0.0187802	0.0442979	1265
Cervix uteri cancer	0.0262252	-0.0143726	0.0698974	189
Colon and rectum cancers	0.058763	0.0348758	0.0858654	504
Oesophagus cancer	0.004903	-0.0838591	0.181634	19
Hodgkin's disease	0.0205055	1.36e-05	0.0523132	49
Kidney and other urinary organ cancers	0.021274	-0.0427352	0.0803959	119
Larynx cancer	-0.0191572	-0.0856495	0.0174542	26
Leukemia	0.0398565	0.0088674	0.0761231	284
Liver cancer	0.115385	0.0376112	0.217325	96
Trachea, bronchus and lung cancers	0.136132	0.0987146	0.175014	439
Non-Hodgkin's lymphoma	0.049941	0.0187084	0.0895079	287
Malignant melanoma of skin	-0.0056994	-0.0203031	0.009607	383
Mouth cancer	-0.0266688	-0.0962769	0.0412404	34
Multiple myeloma	-0.0006939	-0.0818602	0.0819143	40
Other malignant neoplasms	0.0860211	0.0025831	0.18275	273
Pancreas cancer	0.286384	0.0984394	0.474539	53
Prostate cancer	0.0277028	0.0170024	0.0398691	1057
Stomach cancer	0.178609	0.0660178	0.319138	23
Testis cancer	0.0151302	-0.0199939	0.114865	42
Thyroid cancer	0.0234902	-0.018796	0.087039	173
Corpus uteri cancer	-0.260593	-2.02244	0.0435953	8
Alzheimer's disease and other dementias	0.199951	0.152437	0.24824	728
Epilepsy	0.038044	0.0233286	0.0538757	917
Migraine	0.0257935	0.0205602	0.0307396	7001
Multiple sclerosis	0.167981	0.137485	0.200037	507
Other neurological conditions	0.0525193	0.0444743	0.0603188	6900
Parkinson's disease	0.165631	0.130359	0.202302	531
Goitre and Hypothyroidism	0.0195517	0.0012109	0.043266	345
Iron-deficiency anemia	0.0123639	-0.0071989	0.0323781	766
Other nutritional disorders	0.041933	0.0181134	0.0674884	602
Protein-energy malnutrition	0.0784384	-0.0481548	0.268874	16
Other oral	0.0084915	0.0038007	0.0131736	5312
Otitis media	0.0060785	0.0015195	0.0110126	12509
Asthma	0.036767	0.0316291	0.0422075	17578
Chronic obstructive pulmonary disease (COPD)	0.0315845	0.026122	0.0367584	12318
Sarcoidosis	0.0560245	0.0207468	0.0993753	136
Other respiratory diseases	0.014261	0.0093333	0.0191421	10644
Pneumonoconiosis	0.185558	0.0663714	0.363989	106
Cataracts	0.0126881	0.0061643	0.0195053	4126
Glaucoma	0.0132764	0.0064444	0.0207392	3603
Other sense organ disorders	0.0003898	-0.0031244	0.0039476	12621
Refraction and accommodation disorders	-0.0019219	-0.006892	0.0026599	5185
Acne	-0.0027925	-0.0061594	0.0006856	5009
Alopecia	-0.0204182	-0.0335561	-0.0084291	560
Bacterial skin infection (abscess and cellulitis)	0.016961	0.0080302	0.0255085	3346
Bacterial skin infection (impetigo)	0.0144285	-0.0287811	0.0632555	197
Skin ulcer	0.0780586	0.0568892	0.10285	1495
Dermatitis (eczema)	-0.0027468	-0.0069	0.0016229	5226
Dermatophytosis	0.0005468	-0.0072053	0.0090907	2571
Residual skin conditions	-0.0068847	-0.0108228	-0.002679	7700
Pruritus	0.043267	0.0159859	0.0718485	545
Psoriasis	0.0098838	-0.0022857	0.0244387	1007
Scabies	0.0183001	-0.0077024	0.0586999	134
Urticaria	0.0059663	-0.0090449	0.0235988	630
Viral wart	-0.0014263	-0.0077478	0.0052362	1886
Tuberculosis	-0.0040003	-0.0383552	0.0309801	180
Hyperplasia of prostate	-0.0001937	-0.0101413	0.0095587	1302
Acute tubulointerstitial nephritis , pyelonephritis and Urinary tract infections	0.016348	0.0095019	0.0232087	4141
Other urinary diseases	0.0203177	0.0156609	0.0248582	10144
Urolithiasis	0.0128931	0.003869	0.0224696	1715
Varicella (chickenpox)	0.0017542	-0.0463151	0.0621398	409
