# Supplementary material for: Estimating distributions of health state severity for the global burden of disease study
Source: Popul Health Metr. 2015 Nov 18;13:31. doi: 10.1186/s12963-015-0064-y (PMC4650517; doi:10.1186/s12963-015-0064-y)
Supplement: Additional file 4: — NSMHWB 12 month Model Results. (XLSX 10 kb) [file 12963_2015_64_MOESM4_ESM.xlsx]

## Sheet: Annex Table B3 - AHS12 Model Re
Cause	Mean DW	Lower DW	Upper DW	N
Anemia	0.0436829	0.0278549	0.0605835	198
Arthritis	0.0390972	0.0339936	0.0440222	1708
Hypertension	0.0112017	0.0072125	0.0151795	1529
Cancer	0.0452114	0.0256103	0.0657287	197
Diabetes	0.0360035	0.0241549	0.0494593	328
Cardiovascular diseases	0.0526921	0.0434837	0.0625461	657
Hernia	0.0267891	0.0131541	0.0412603	312
Kidney disease	0.0636317	0.0358356	0.0916923	119
Gallbladder and biliary diseases	0.0540395	0.0221161	0.0871605	138
Alcohol use disorders	0.0214298	0.0129535	0.0303181	437
Anxiety disorders	0.0626882	0.0506552	0.0749623	926
Other drug use disorders	0.0405244	0.0269687	0.0558364	205
Other mental and substance use disorders	0.021993	0.009524	0.0345599	440
Dysthymia	0.115834	0.0655601	0.173227	132
Major depressive disorder	0.081937	0.0712667	0.0932508	779
Asthma	0.0193961	0.0145853	0.0243413	1111
Peptic ulcer disease	0.0611721	0.0460178	0.077202	357
Upper respiratory infections	0.0685359	0.0487624	0.0894092	259
